# Supplementary material for: Pressure-induced metallicity and piezoreductive transition of metal-centres in conductive 2-dimensional metal–organic frameworks
Source: Royal Society of Chemistry journal article supplement (doi:10.1039/c9cp04797b), 2019-01-01
Supplement: c9cp04797b2.pdf [file c9cp04797b2.pdf]

## Supplementary Information

### Pressure-Induced Metallicity and Piezoreductive Transition of Metal-Centers in Conductive 2-Dimensional Metal-Organic Frameworks

Khoa N. Le<sup>a</sup> and Christopher H. Hendon<sup>\*a</sup>

<sup>a</sup> Department of Chemistry and Biochemistry, University of Oregon, Eugene, OR, 97401, USA.

#### Bond lengths for the monolayers:

**Table 1.** Ni<sub>3</sub>(HIB)<sub>2</sub> bond lengths at different hydrostatic pressure.

| Pressure (kBar) | Bond Length (Å) |         |         |         |
|-----------------|-----------------|---------|---------|---------|
|                 | Ni-N            | N-C     | N-H     | C-C     |
| 42.83           | 1.72895         | 1.29975 | 1.01484 | 1.34831 |
| 39.67           | 1.73125         | 1.30184 | 1.01541 | 1.35169 |
| 36.68           | 1.73366         | 1.30396 | 1.01593 | 1.35509 |
| 33.78           | 1.73639         | 1.30614 | 1.01644 | 1.35846 |
| 31.04           | 1.73938         | 1.30815 | 1.01683 | 1.36205 |
| 28.4            | 1.74247         | 1.31028 | 1.01733 | 1.36545 |
| 25.85           | 1.74572         | 1.31242 | 1.01765 | 1.36918 |
| 23.4            | 1.74918         | 1.31452 | 1.01806 | 1.37288 |
| 21.08           | 1.75291         | 1.31668 | 1.01842 | 1.37664 |
| 18.89           | 1.75689         | 1.31884 | 1.01877 | 1.38028 |
| 16.75           | 1.76102         | 1.321   | 1.01907 | 1.38412 |
| 14.68           | 1.76529         | 1.3232  | 1.01936 | 1.38799 |
| 12.72           | 1.76989         | 1.32531 | 1.01954 | 1.39191 |
| 10.83           | 1.77476         | 1.32756 | 1.0198  | 1.3957  |
| 9.01            | 1.77993         | 1.32969 | 1.02009 | 1.39966 |
| 7.28            | 1.78519         | 1.33179 | 1.0203  | 1.40387 |
| 5.62            | 1.79072         | 1.33403 | 1.02051 | 1.40785 |
| 4.04            | 1.79654         | 1.33609 | 1.02068 | 1.41193 |
| 2.53            | 1.80257         | 1.33831 | 1.02082 | 1.41625 |
| 1.07            | 1.8088          | 1.34037 | 1.02106 | 1.42024 |
| -0.3            | 1.8152          | 1.34243 | 1.02123 | 1.42492 |
| -1.63           | 1.82215         | 1.34447 | 1.02138 | 1.42907 |
| -2.88           | 1.82923         | 1.34666 | 1.02148 | 1.43289 |
| -4.08           | 1.8365          | 1.34854 | 1.02163 | 1.43729 |
| -5.19           | 1.84411         | 1.35057 | 1.02177 | 1.44107 |
| -6.26           | 1.85194         | 1.3524  | 1.02195 | 1.44525 |
| -7.27           | 1.86002         | 1.35426 | 1.02202 | 1.44971 |
| -8.22           | 1.86864         | 1.35605 | 1.02223 | 1.45358 |
| -9.12           | 1.87756         | 1.35785 | 1.02227 | 1.45778 |
| -9.94           | 1.88667         | 1.35966 | 1.02239 | 1.46164 |
| -10.71          | 1.896           | 1.36126 | 1.02247 | 1.46571 |
| -11.45          | 1.90573         | 1.36282 | 1.02261 | 1.46986 |
| -12.11          | 1.91591         | 1.3643  | 1.02275 | 1.47389 |
| -12.72          | 1.92647         | 1.36561 | 1.02282 | 1.47774 |
| -13.28          | 1.93706         | 1.36701 | 1.02294 | 1.48174 |
| -13.8           | 1.94816         | 1.36823 | 1.02302 | 1.48531 |
| -14.26          | 1.95973         | 1.36925 | 1.02311 | 1.48869 |
| -13.01          | 1.99858         | 1.3576  | 1.0252  | 1.48736 |
| -9.98           | 2.054           | 1.33753 | 1.02706 | 1.47876 |
| -10.29          | 2.06732         | 1.33796 | 1.02709 | 1.4814  |
| -10.59          | 2.08068         | 1.33831 | 1.02705 | 1.48395 |

**Table 2.** Ni<sub>3</sub>(HITP)<sub>2</sub> bond lengths at different hydrostatic pressure.

| Pressure (kBar) | Bond Length (Å) |         |         |         |         |
|-----------------|-----------------|---------|---------|---------|---------|
|                 | Ni-N            | N-C     | C-H     | N-H     | C-C     |
| 30.73           | 1.71414         | 1.2967  | 1.08209 | 1.0166  | 1.33    |
| 28.47           | 1.71614         | 1.29885 | 1.08285 | 1.017   | 1.33332 |
| 26.33           | 1.71838         | 1.30086 | 1.08359 | 1.01733 | 1.33641 |
| 24.27           | 1.721           | 1.30304 | 1.08433 | 1.01768 | 1.33955 |
| 22.29           | 1.72387         | 1.30527 | 1.08507 | 1.01806 | 1.34275 |
| 20.39           | 1.72712         | 1.30757 | 1.08575 | 1.01841 | 1.34596 |
| 18.55           | 1.7307          | 1.30992 | 1.08641 | 1.01877 | 1.34916 |
| 16.8            | 1.73446         | 1.31224 | 1.08694 | 1.01906 | 1.35253 |
| 15.13           | 1.73873         | 1.31464 | 1.08759 | 1.0194  | 1.356   |
| 13.53           | 1.74303         | 1.31702 | 1.08821 | 1.01969 | 1.35929 |
| 11.98           | 1.74797         | 1.31935 | 1.08879 | 1.02    | 1.36263 |
| 10.52           | 1.75301         | 1.32163 | 1.08931 | 1.02026 | 1.36603 |
| 9.11            | 1.75823         | 1.32423 | 1.08985 | 1.02048 | 1.36936 |
| 7.74            | 1.76396         | 1.32657 | 1.09041 | 1.02071 | 1.37302 |
| 6.45            | 1.76998         | 1.32898 | 1.09092 | 1.02095 | 1.37638 |
| 5.21            | 1.77613         | 1.33144 | 1.09147 | 1.02116 | 1.37994 |
| 4.02            | 1.78288         | 1.33389 | 1.09187 | 1.02135 | 1.38365 |
| 2.89            | 1.78965         | 1.33633 | 1.0923  | 1.02152 | 1.38729 |
| 1.81            | 1.79683         | 1.33886 | 1.09274 | 1.02172 | 1.3908  |
| 0.78            | 1.80438         | 1.34124 | 1.09312 | 1.02192 | 1.39428 |
| -0.2            | 1.81235         | 1.34363 | 1.09355 | 1.02213 | 1.39778 |
| -1.13           | 1.82064         | 1.34604 | 1.09391 | 1.02227 | 1.40136 |
| -2.01           | 1.82908         | 1.34828 | 1.09424 | 1.02235 | 1.40462 |
| -2.84           | 1.83836         | 1.35068 | 1.09455 | 1.02253 | 1.40829 |
| -3.64           | 1.84773         | 1.35303 | 1.09489 | 1.02264 | 1.41189 |
| -4.38           | 1.85722         | 1.35512 | 1.09516 | 1.02278 | 1.41569 |
| -5.1            | 1.86764         | 1.35739 | 1.0954  | 1.0229  | 1.41907 |
| -5.76           | 1.87887         | 1.35948 | 1.09574 | 1.02309 | 1.42244 |
| -6.37           | 1.88986         | 1.36141 | 1.09591 | 1.02316 | 1.42604 |
| -6.93           | 1.90123         | 1.36335 | 1.09613 | 1.02332 | 1.42959 |
| -7.47           | 1.91383         | 1.3652  | 1.09638 | 1.02339 | 1.43318 |
| -7.97           | 1.92652         | 1.36685 | 1.09653 | 1.0235  | 1.4362  |
| -8.42           | 1.94051         | 1.36839 | 1.09668 | 1.02362 | 1.43947 |
| -8.84           | 1.95584         | 1.36995 | 1.09675 | 1.02367 | 1.44247 |
| -9.19           | 1.9719          | 1.37126 | 1.09691 | 1.02378 | 1.44541 |
| -9.52           | 1.98803         | 1.37247 | 1.09704 | 1.02389 | 1.44819 |
| -9.81           | 2.0055          | 1.3733  | 1.09715 | 1.02398 | 1.45086 |
| -10.05          | 2.02341         | 1.37411 | 1.09721 | 1.0241  | 1.45354 |
| -10.24          | 2.04361         | 1.37472 | 1.09731 | 1.02415 | 1.45584 |
| -10.38          | 2.06541         | 1.37501 | 1.09743 | 1.02427 | 1.45769 |

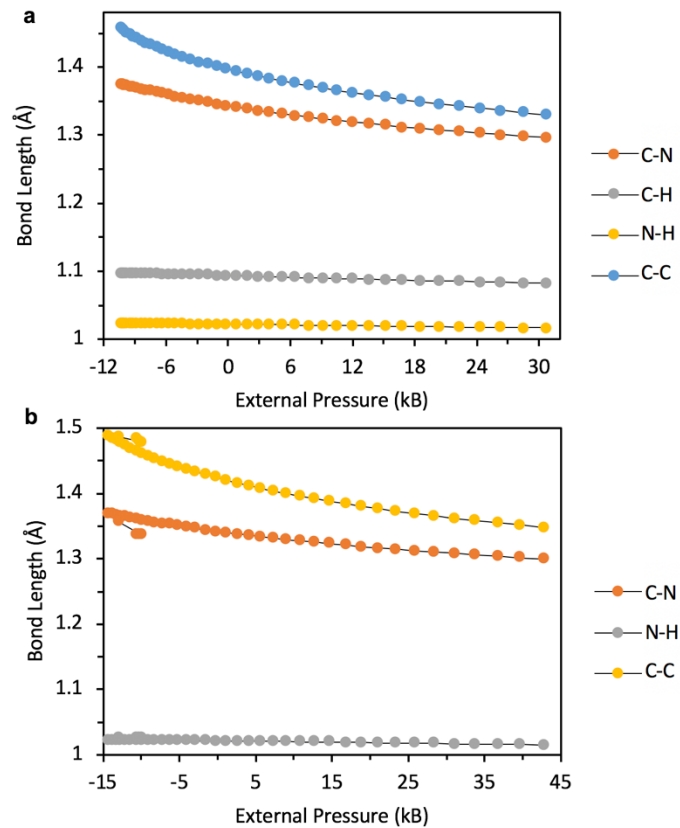

**Figure S1.** A structural comparison of both (a)  $\text{Ni}_3(\text{HITP})_2$  and (b)  $\text{Ni}_3(\text{HIB})_2$  at various external pressure.

Example of unit cell used for the pressure:

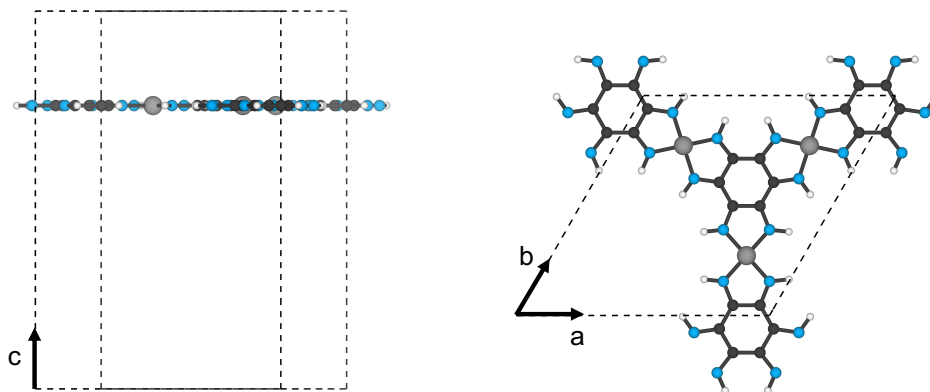

**Figure S2.**  $\text{Ni}_3(\text{HIB})_2$  unit cell at lattice constant 1.0. The vacuum lay along the c-direction (left) and the monolayer is parallel to the ab-plane (right).

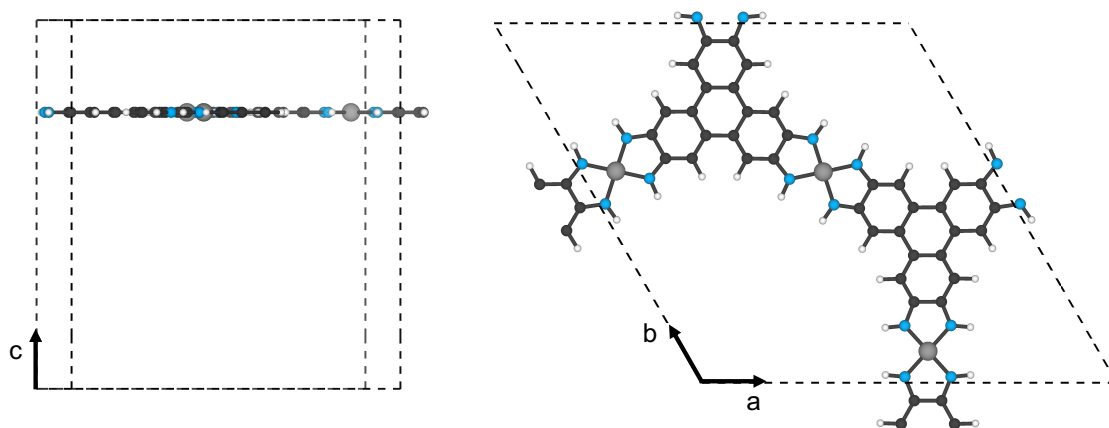

**Figure S3.**  $\text{Ni}_3(\text{HITP})_2$  unit cell at lattice constant 1.0. The vacuum lay along the c-direction (left) and the monolayer is parallel to the ab-plane (right).

**PBEsol functional compare to GGA functional:**

For this study, the most important feature is the closing of the band gap and shift in energy of the Ni-N orbital that cause the change in magnetic properties. For this reason, we chose to use the PBEsol functional for all calculation to minimize computation cost. Hybrid functional such as HSE06 might produce higher quality band structures but very expensive and only contain similar information that can be capture by calculation at the GGA level (Figure 3). As show below, both structure for  $\text{Ni}_3(\text{HITP})_2$  displace a band gap correspond to a semi-conductive material and no band gap for  $\text{Ni}_3(\text{HIB})_2$ . Both functionals are consistence with one another, hence PBEsol is sufficient for this study.

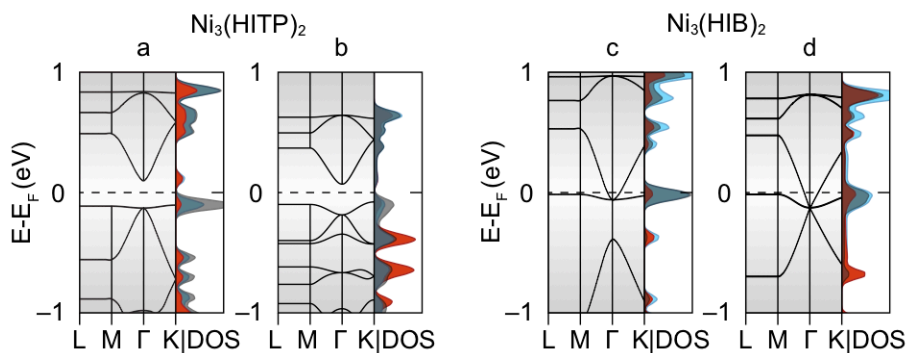

**Figure S4.** Electronic band structure and density of state of  $\text{Ni}_3(\text{HITP})_2$  (left) and  $\text{Ni}_3(\text{HIB})_2$  (right) computed by two different functionals: (a) HSE06 and (b) PBEsol for  $\text{Ni}_3(\text{HITP})_2$ ; (c) HSE06 and (d) PBEsol for  $\text{Ni}_3(\text{HIB})_2$ .

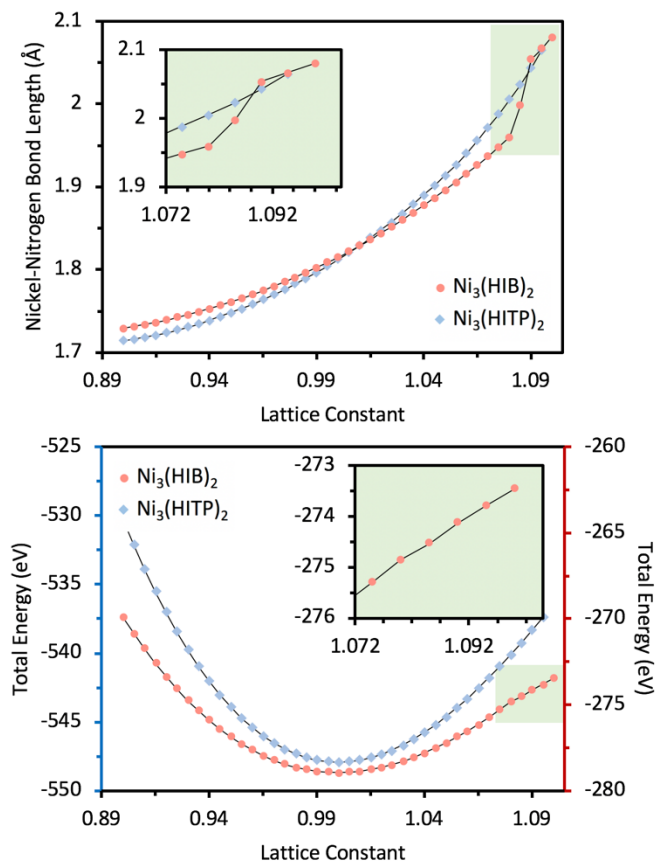

**Figure S5.** A structural (a) and energetic (b) comparison of both  $\text{Ni}_3(\text{HITP})_2$  and  $\text{Ni}_3(\text{HIB})_2$  at various lattice constant. The inset graphs highlight the  $\text{Ni}^{2+}$  piezoreduction upon expansion of the  $\text{Ni}_3(\text{HIB})_2$  lattice.
